# Supplementary material for: Dietary tryptophan links encephalogenicity of autoreactive T cells with gut microbial ecology
Source: PubMed Central journal article supplement (PMC6814758; doi:10.1038/s41467-019-12776-4), 2019-10-25
Supplement: 41467_2019_12776_MOESM1_ESM.pdf [file 41467_2019_12776_MOESM1_ESM.pdf]

## **Supplementary Information**

**Dietary tryptophan links encephalogenicity of autoreactive T cells with gut microbial ecology**

**Sonner et al.**

## Supplementary Figures

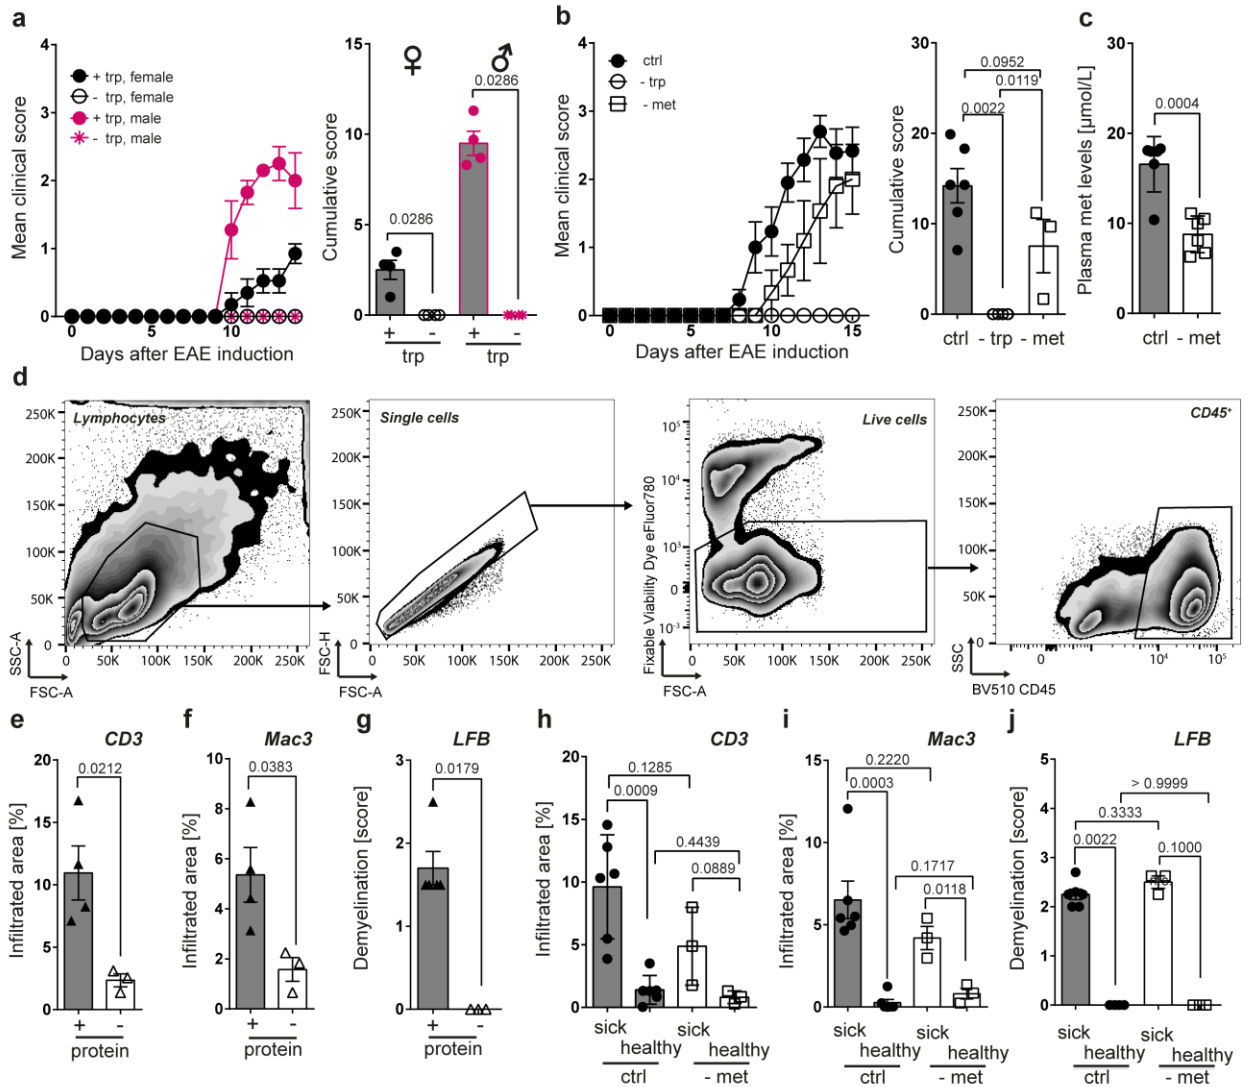

**Supplementary Fig. 1** Methionine-free diet partially inhibits EAE. **a** Mean clinical EAE scores and cumulative scores of male and female mice ( $n = 4$ ). **b** Mean clinical EAE scores and cumulative scores (ctrl:  $n = 6$ ; -trp:  $n = 6$ ; -met:  $n = 3$ ). **c** Plasma met levels of EAE mice (ctrl:  $n = 6$ ; -met:  $n = 6$ ). **d** Flow cytometry gating strategy for identification of leukocytes ( $\text{CD45}^+$ ) in spinal cord from EAE mice as displayed in **Fig. 2d**. **e-g** Quantitative analysis of **e** T cell and **f** macrophages infiltration, as well as **g** demyelination on spinal cord sections (+protein:  $n = 4$ ; -protein:  $n = 3$ ). **h-j** Quantitative analysis of **h** T cell and **i** macrophages infiltration, as well as **j** demyelination on spinal cord sections derived from sick mice, healthy mice (resistant to EAE induction) and both sick and healthy mice that were deprived of met. Statistics: Mann-Whitney  $U$ -test for **a**, **b**, **g**, **j**; unpaired two-tailed Student's  $t$ -test for **e**, **f**, **h**, **i**. Each dot represents one individual mouse. Data are presented as mean  $\pm$  SEM. Source data are provided as a Source Data file

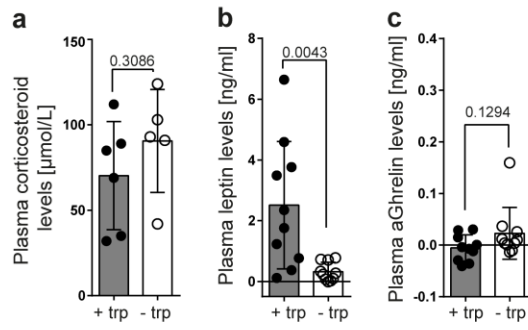

**Supplementary Fig. 2** DTR reduces systemic leptin levels. **a** Plasma corticosteroid levels of EAE mice (+trp:  $n = 6$ ; -trp:  $n = 5$ ). **b-c** Plasma levels of **b** leptin and **c** active ghrelin in EAE mice on d14 post-immunization (+trp:  $n = 10$ ; -trp:  $n = 10$ ). Statistics: unpaired two-tailed Student's  $t$ -test for **a-c**. Each dot represents one individual mouse. Data are presented as mean  $\pm$  SEM. Source data are provided as a Source Data file

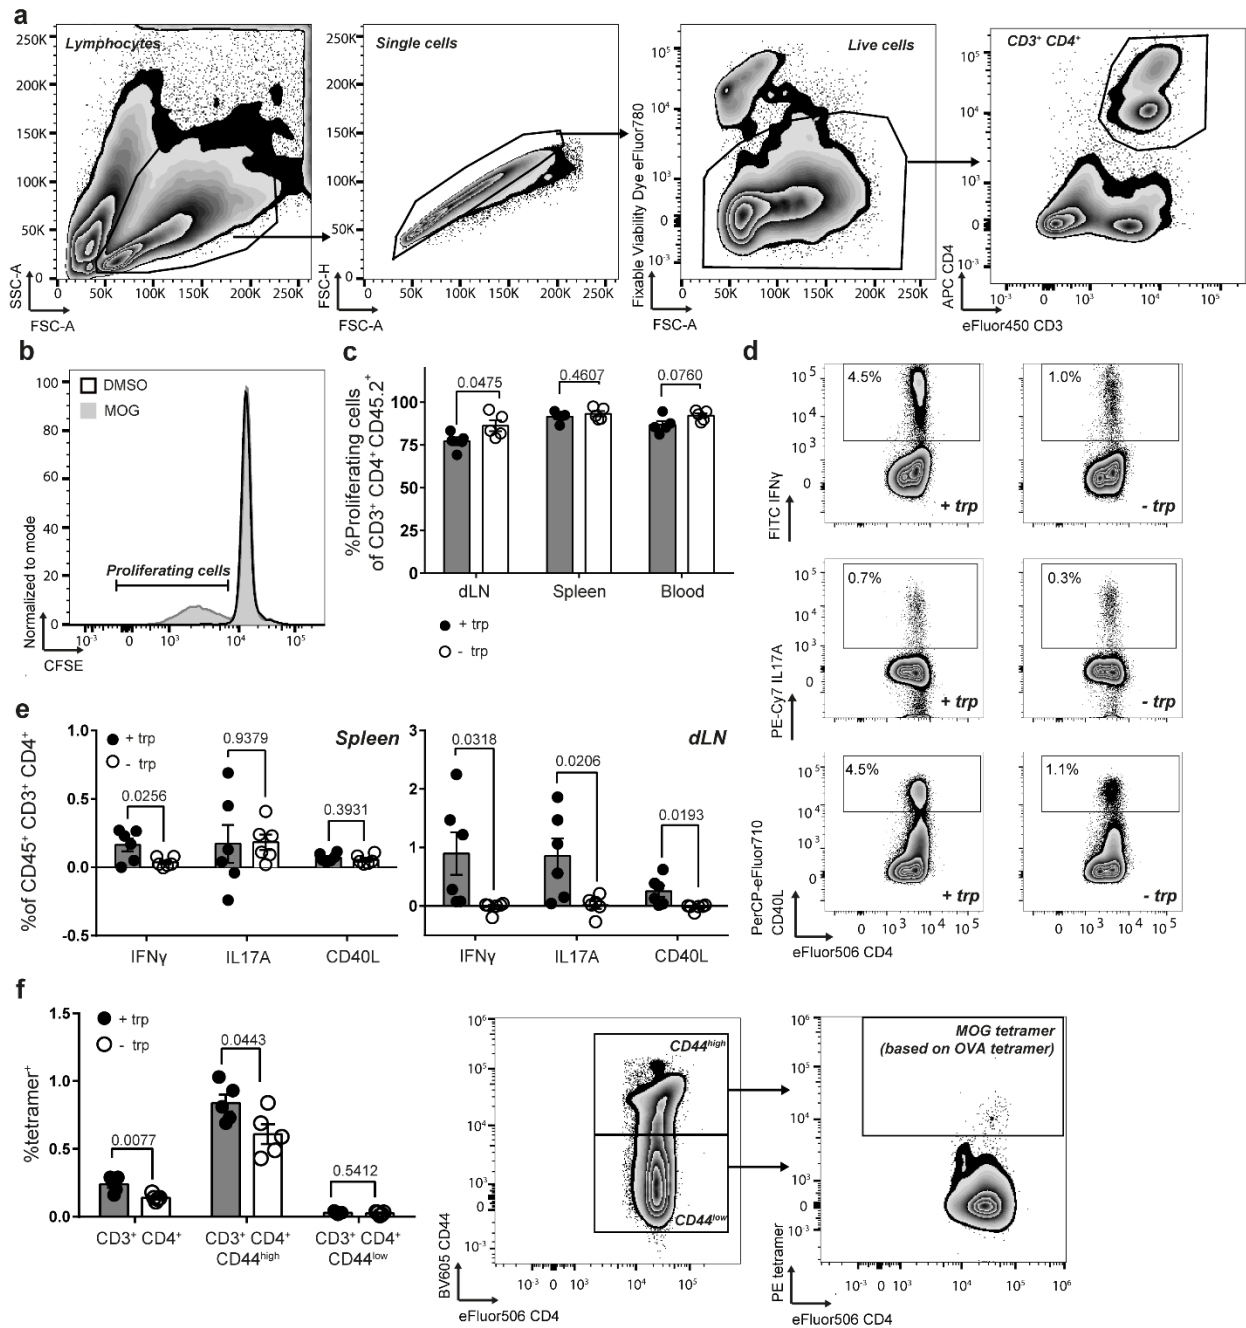

**Supplementary Fig. 3** DTR decreases frequency of MOG-reactive T cells in induction phase. **a** Flow cytometry gating strategy for identification of CD4<sup>+</sup> T cells as used in **Fig. 3d**, **Fig. 3e**, **Fig. 3g**, **Fig. 3h**, **Supplementary Fig. 3b-f**, **Supplementary Fig. 4a** and **Supplementary Fig. 4c** prior to sub-gating. **b** Gating strategy for identification of proliferating CD4<sup>+</sup> T cells. A similar gating strategy was using in **c**. **c** *In vivo* proliferation of 2D2 CD4<sup>+</sup> T cells in naïve C57BL/6J recipient mice that received either a trp-free ( $n = 5$ ) or control ( $n = 5$ ) diet. Five days post-immunization dLN, spleens and blood were collected to determine the frequency of proliferating MOG<sub>35-55</sub>-reactive CD4<sup>+</sup> T cells within CD45.2<sup>+</sup> CD3<sup>+</sup> CD4<sup>+</sup> cells by flow cytometry. A similar gating strategy was used in **Fig. 3e**. **d** Representative flow cytometry plots for IFN $\gamma$  and IL17A secretion, as well as CD40L expression on CD3<sup>+</sup> CD4<sup>+</sup> T cells from **Fig. 3h**. **e** Secondary lymphoid organs were isolated from EAE mice on d7 ( $n = 6$ ). After *in vitro* restimulation with MOG<sub>35-55</sub> or IDH1<sub>123-142</sub> expression of IFN $\gamma$ , IL17A and CD40L was measured by intracellular cytokine staining (ICS). **f** Identification of MOG<sub>35-55</sub>-reactive T cells by tetramer staining of d7 EAE animals (+trp:  $n = 5$ ; -trp:  $n = 5$ ). Statistics: unpaired two-tailed Student's *t*-test for **c**, **e-f**. Each dot represents one individual mouse. Data are presented as mean  $\pm$  SEM. Source data are provided as a Source Data file

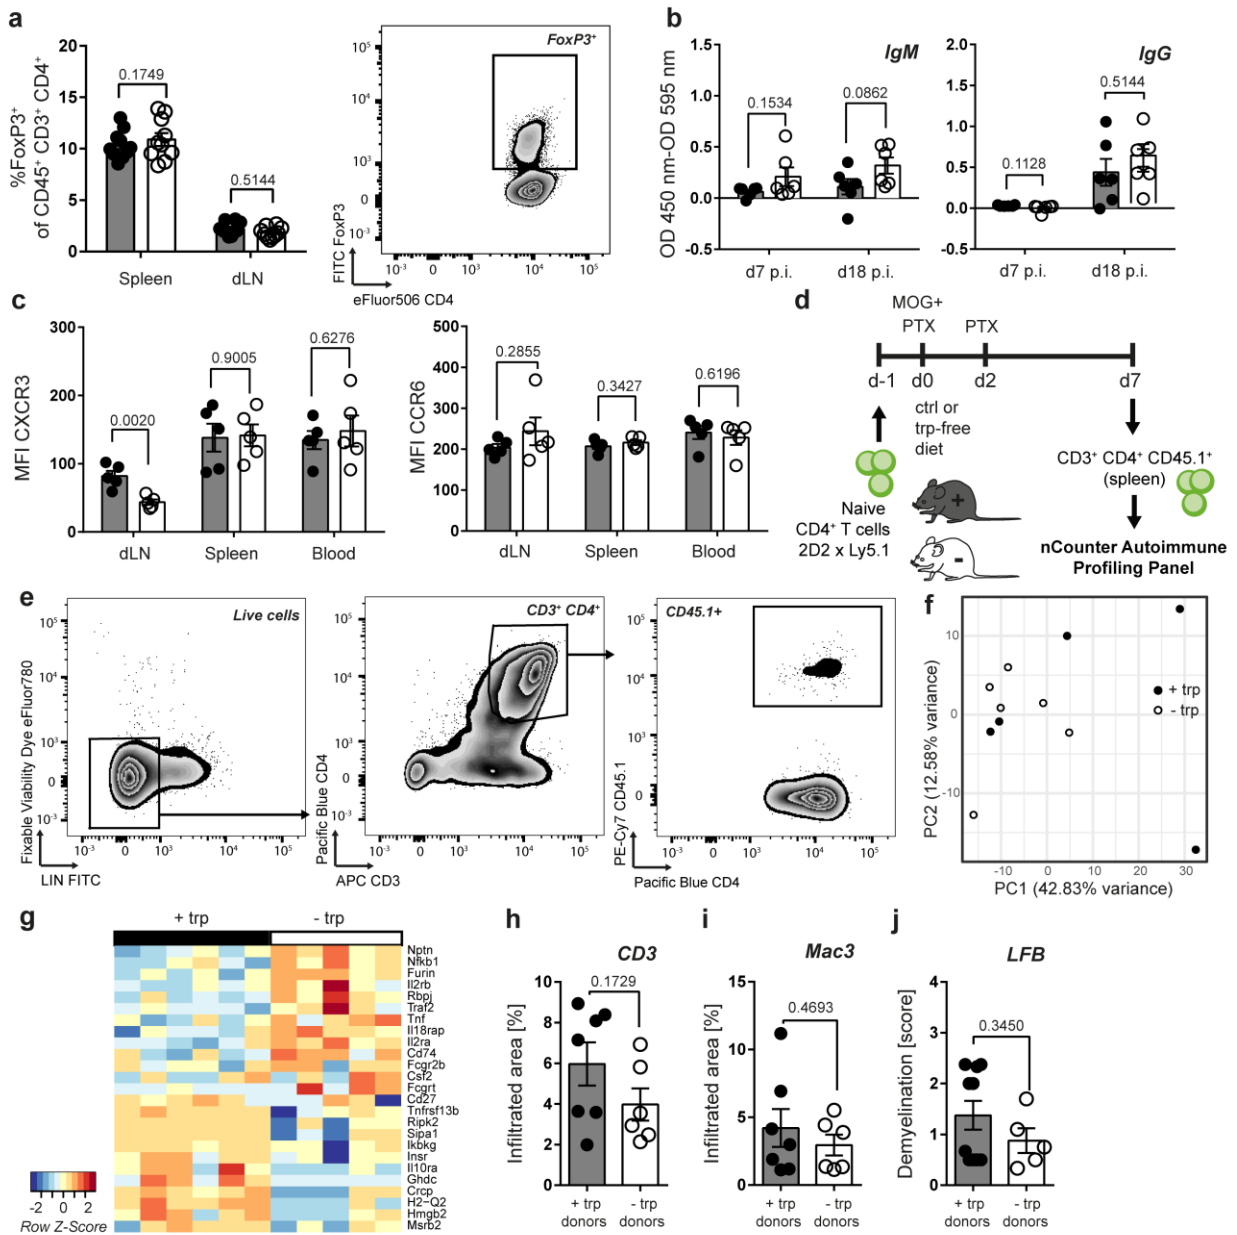

**Supplementary Fig. 4** DTR impairs pro-inflammatory T cell responses without T<sub>reg</sub> induction and antibody involvement. **a** Frequency of FoxP3<sup>+</sup> CD4<sup>+</sup> T cells within spleen and dLN in d14 EAE animals (+trp: *n* = 10; -trp: *n* = 10). **b** ELISA for anti-MOG antibody titers at d7 and d18 post-immunization (p.i.) for IgM and IgG in plasma from EAE mice (+trp: *n* = 6; -trp: *n* = 6). **c** Expression of CXCR3 and CCR6 on donor T cells from **Supplementary Fig. 3c** by flow cytometry. **d-g** NanoString gene expression profiling of MOG-reactive 2D2 T cells. CD3<sup>+</sup> CD4<sup>+</sup> CD45.1<sup>+</sup> T cells were subjected to gene expression analysis using the nCounter Autoimmune Profiling Panel. **d** Experimental setup, **e** sorting strategy after exclusion of doublets as illustrated in **Supplementary Fig. 3a**, **f** PCA and **g** heatmap of differentially regulated genes. **h-j** Recipient mice have been transplanted with T cells of immunized donor mice on either a trp-proficient or -deficient diet. Spinal cords of recipients were isolated and stained for **h** T cells (*n* = 7 vs. *n* = 6), **i** macrophages (*n* = 7 vs. *n* = 6) and **j** demyelination (*n* = 9 vs. *n* = 5). Statistics: unpaired two-tailed Student's *t*-test for **a-c**, **h**, **i**; Mann-Whitney *U*-test for **j**. Each dot represents one individual mouse. Data are presented as mean ± SEM. Source data are provided as a Source Data file or in Supplementary Data 1

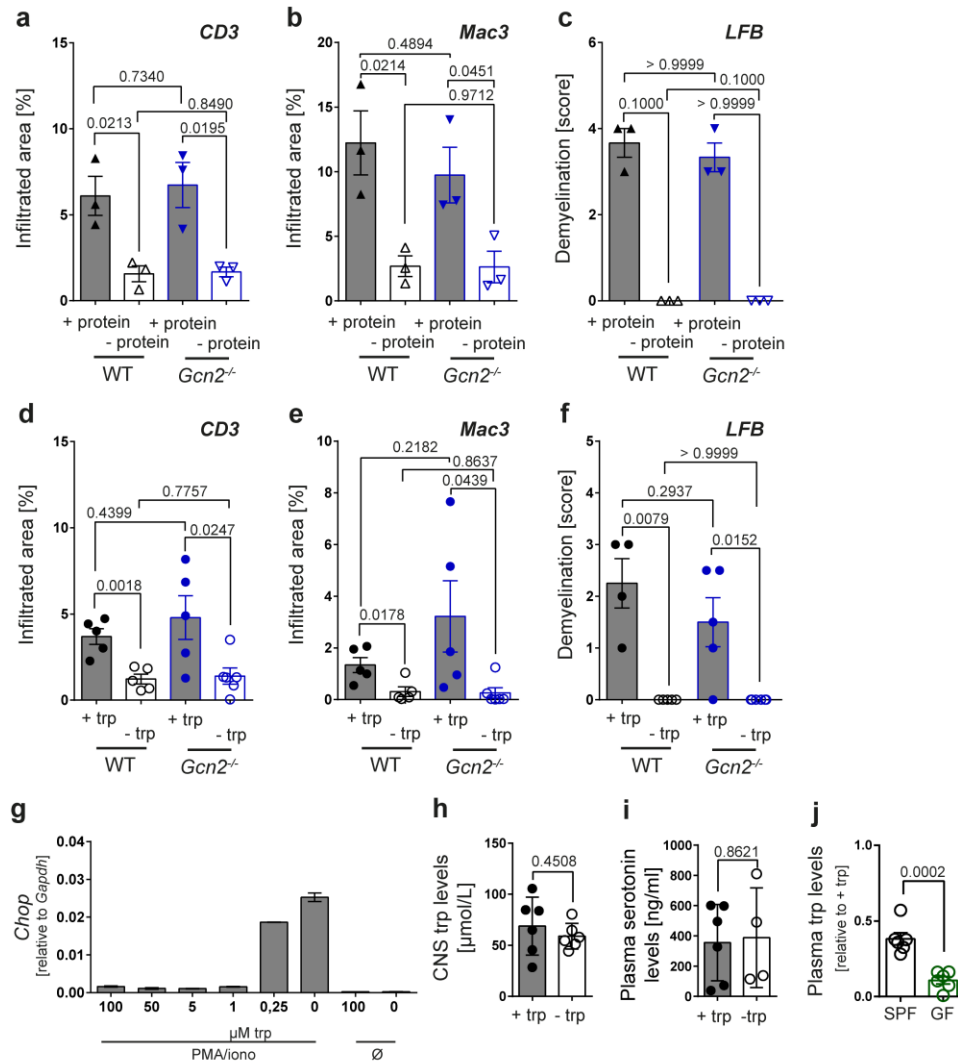

**Supplementary Fig. 5** *Gcn2*-deficient mice show similar pathological hallmarks of EAE after DPR or DTR. **a-c** Histological stainings of spinal cords of mice from **Fig. 4a** for **a** T cell infiltration, **b** macrophage infiltration and **c** demyelination. **d-f** Histological stainings of spinal cords of mice from **Fig. 4b** for **d** T cell infiltration, **e** macrophage infiltration and **f** demyelination. Each dot represents one mouse. **g** *Chop* expression after activation of WT T cells. Increasing concentrations of trp were added as indicated. **h** Trp levels in the spinal cord tissue of EAE mice (+trp:  $n = 6$ ; -trp:  $n = 6$ ). **i** Serotonin plasma levels of EAE mice on d14 post-immunization (+trp:  $n = 6$ ; -trp:  $n = 4$ ). **j** Plasma trp levels of GF ( $n = 6$ ) and SPF ( $n = 6$ ) EAE mice 16 days post-immunization. Ratios between animals that received a trp-free diet and control animals were calculated to estimate the relative drop in trp plasma levels. Statistics: unpaired two-tailed Student's *t*-test for **a, b, d, e, h-j**; Mann-Whitney *U*-test for **c** and **f**. Each dot represents one individual mouse. Data are presented as mean  $\pm$  SEM. Source data are provided as a Source Data file

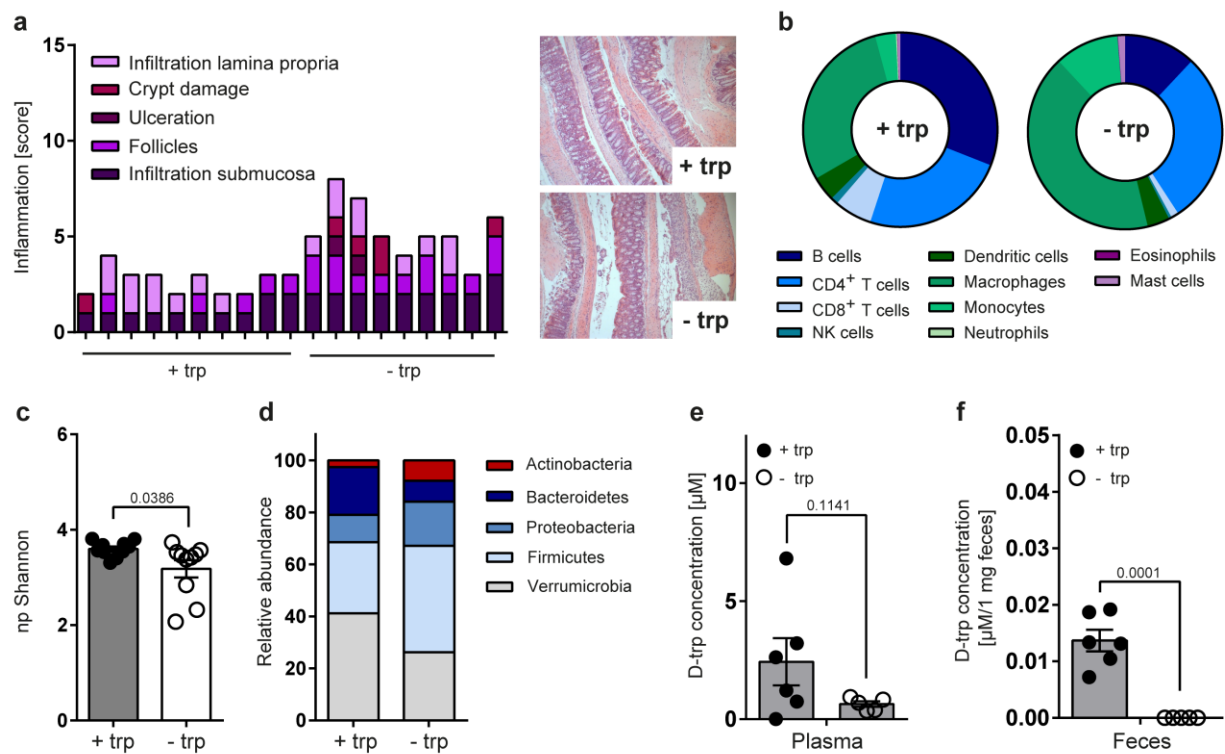

**Supplementary Fig. 6** DTR drives Intestinal dysbiosis. **a** Histopathological inflammation in the colon for individual mice from **Fig. 5**. **b** ImmuCC analysis for RNA sequencing samples of colon tissue for mice from **Fig. 5**. **c** Alpha diversity index presented by non parametric (np) Shannon diversity. **d** Relative abundance of major bacterial phyla. **e-f** D-tryptophan concentrations in plasma and feces from EAE mice (+trp:  $n = 6$ ; -trp:  $n = 5$ ). **e** Plasma was obtained on d18 post-immunization. **f** Feces was obtained on d9 post-immunization. Statistics: unpaired two-tailed Student's  $t$  test in **a**, **c**, **e**, **f**. Each dot represents one individual mouse. Data are presented as mean  $\pm$  SEM. Source data are provided as a Source Data file or in Supplementary Data 2

## Supplementary Tables

Supplementary Table 1: Clinical scoring system for chronic EAE

| Score | Clinical signs                                                                                                                 |
|-------|--------------------------------------------------------------------------------------------------------------------------------|
| 0     | No clinical signs                                                                                                              |
| 0.7   | Partial tail paralysis                                                                                                         |
| 1.0   | Complete tail paralysis                                                                                                        |
| 1.3   | Tail paralysis and insecure walking                                                                                            |
| 1.7   | Hind limbs only rarely slip through grid                                                                                       |
| 2.0   | Hind limbs frequently slip through grid, but secure footsteps still possible<br>No abnormalities inside cage                   |
| 2.3   | Normal walking on grid not possible<br>Evident hind limb paralysis on grid, but hind limb movement clearly visible inside cage |
| 2.7   | Paralysis of one hind limb inside the cage                                                                                     |
| 3.0   | Complete paralysis of hind limbs, mice drag hind limbs behind symmetrically                                                    |
| 3.3   | Hip rotation and worsening general impression (pale fur, hunch)                                                                |
| 3.7   | Front limbs lose their grip to grid when mice are held above cage by their tail<br>Front limbs may slip through grid           |
| 4.0   | Movement of front limbs inside cage<br>Locomotion inside cage restricted                                                       |
| 4.3   | Paralysis of one front limb<br>Locomotion inside cage not possible                                                             |
| 5.0   | Death                                                                                                                          |
